# Supplementary material for: Isolation and Characterization of Tissue Resident CD29-Positive Progenitor Cells in Livestock to Generate a Three-Dimensional Meat Bud
Source: MDPI journal article supplement (doi:10.3390/cells10092499), 2021-09-21
Supplement: s1 [file s1]

a

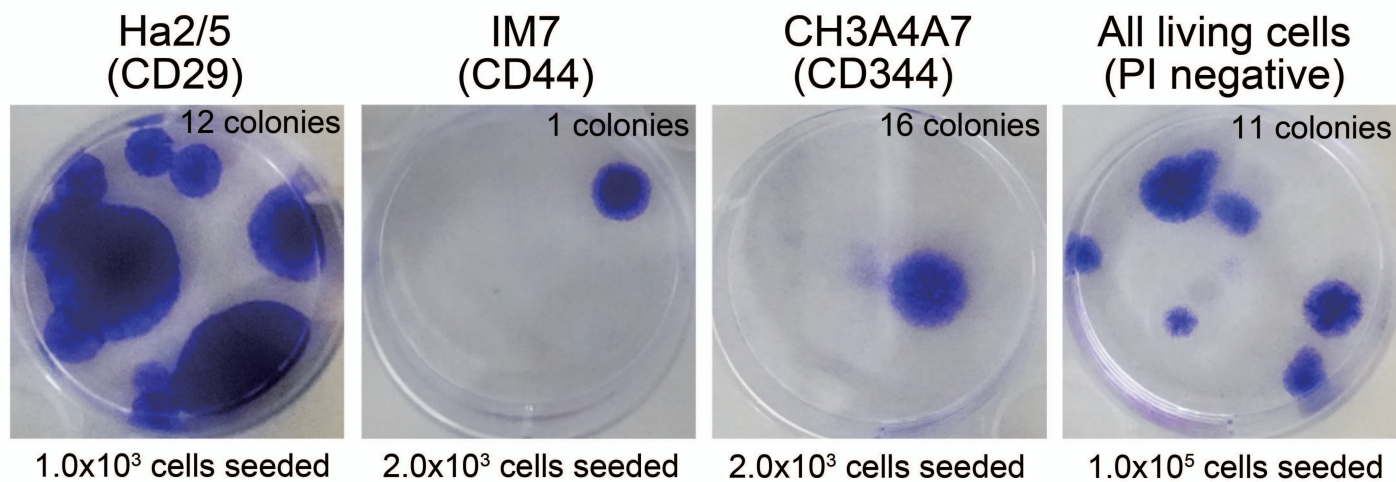

b

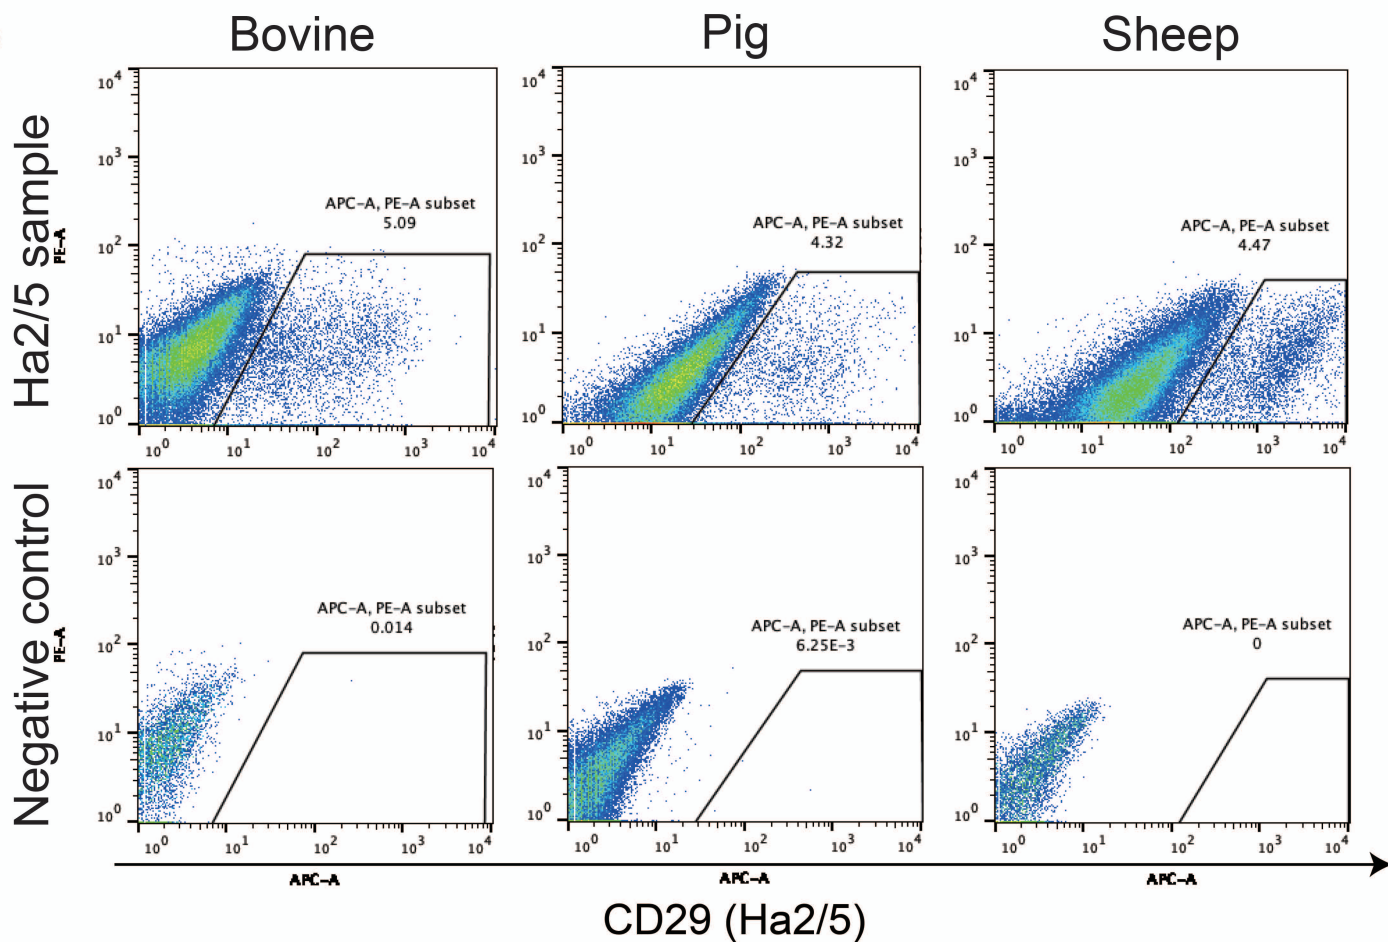

c

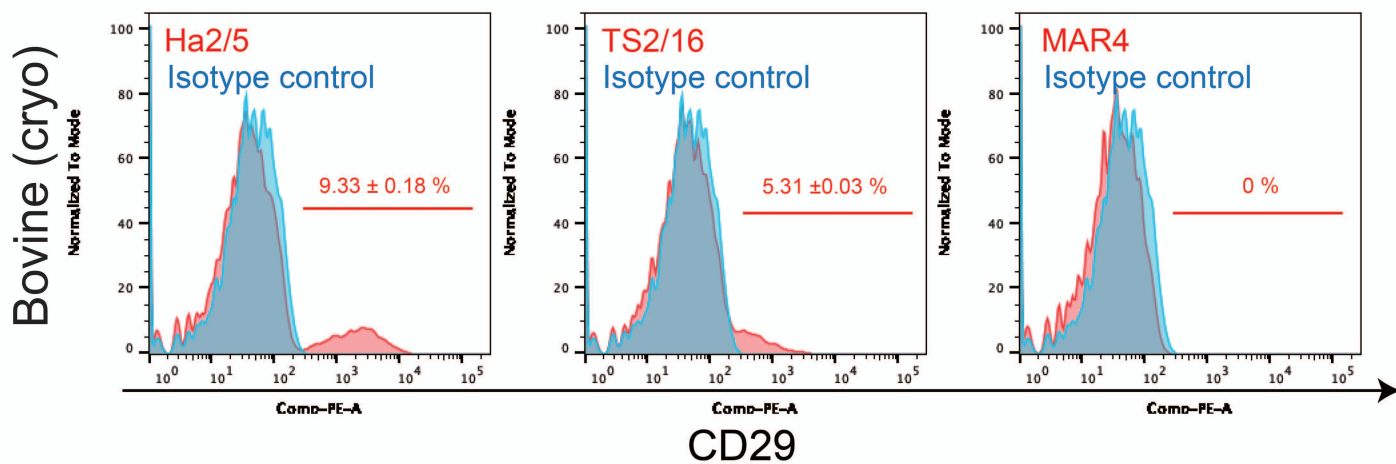

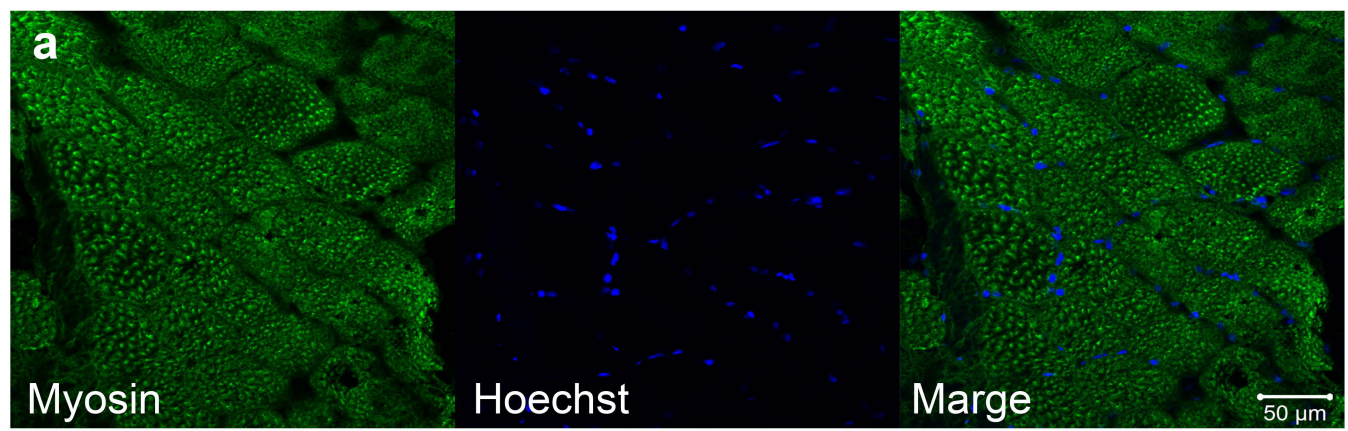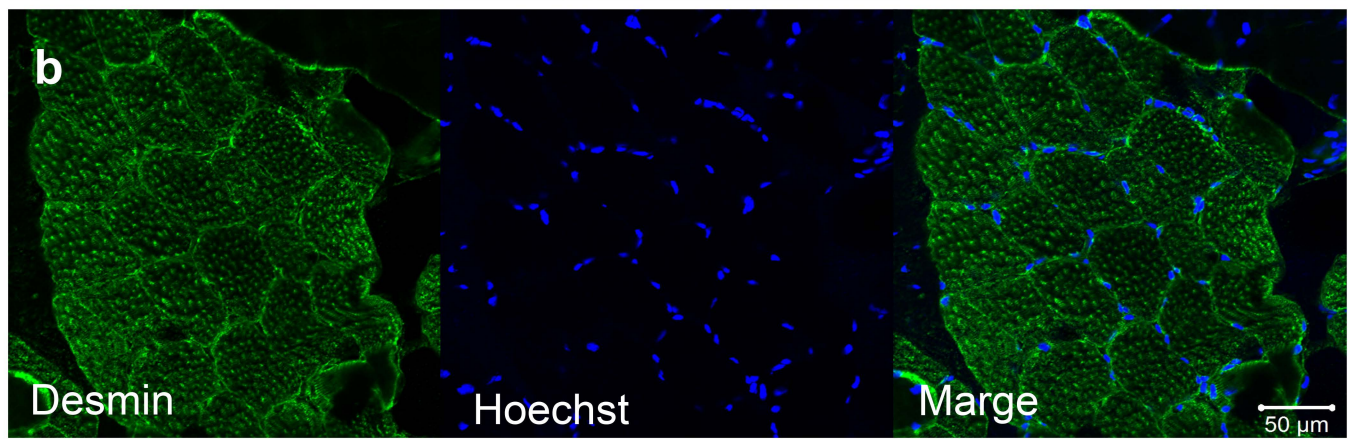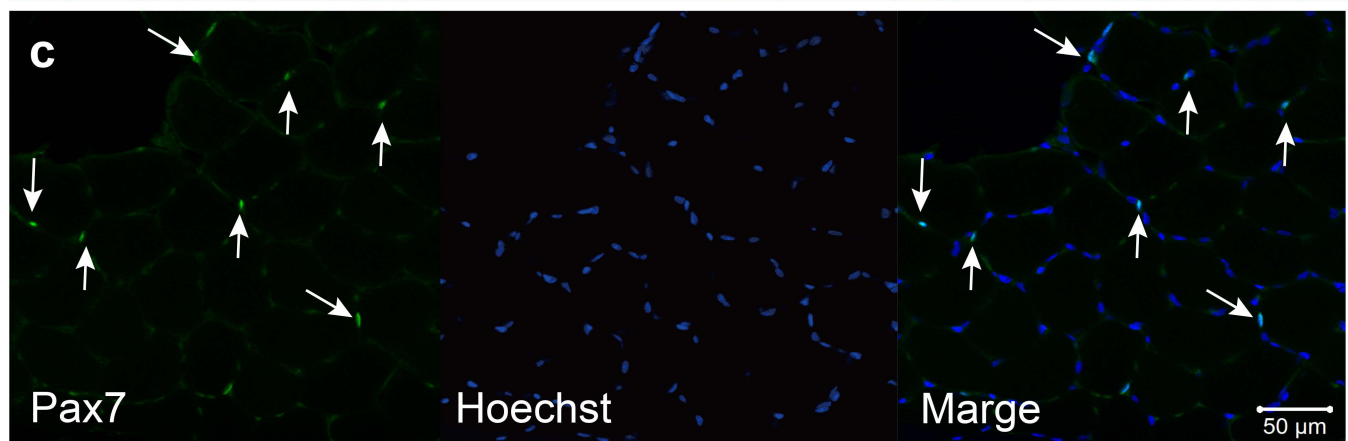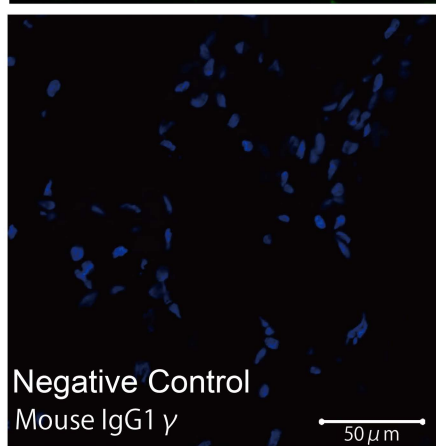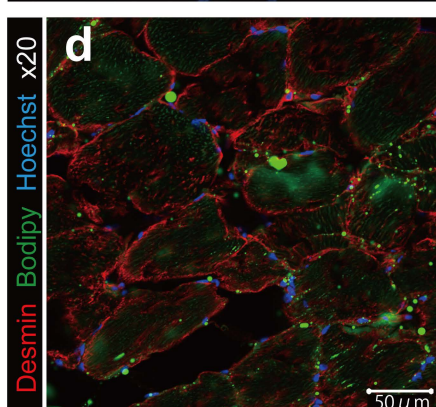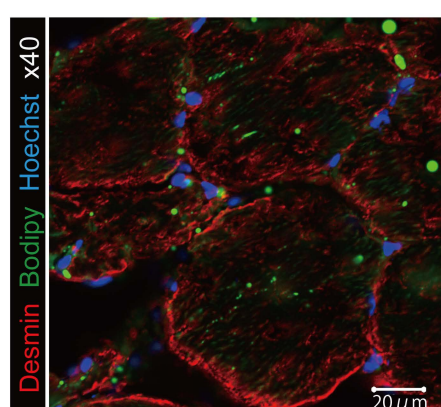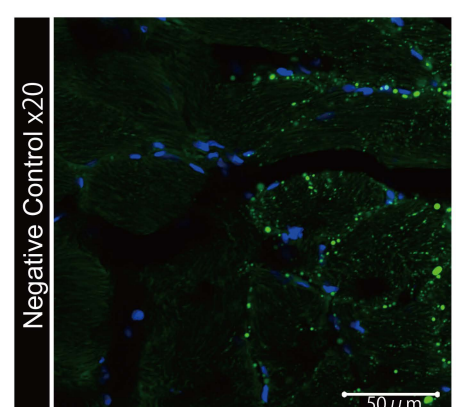

**Supplementary Figure S2**



**a**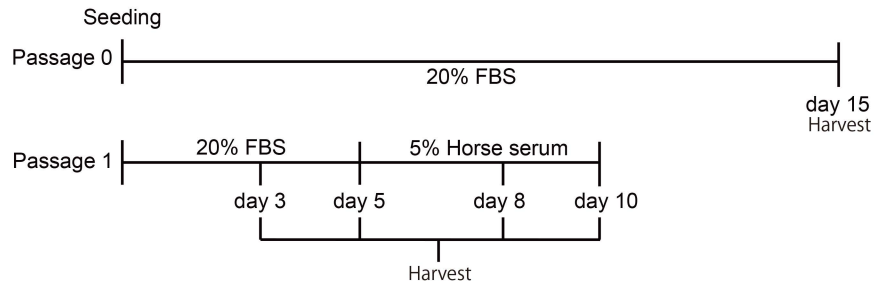**b**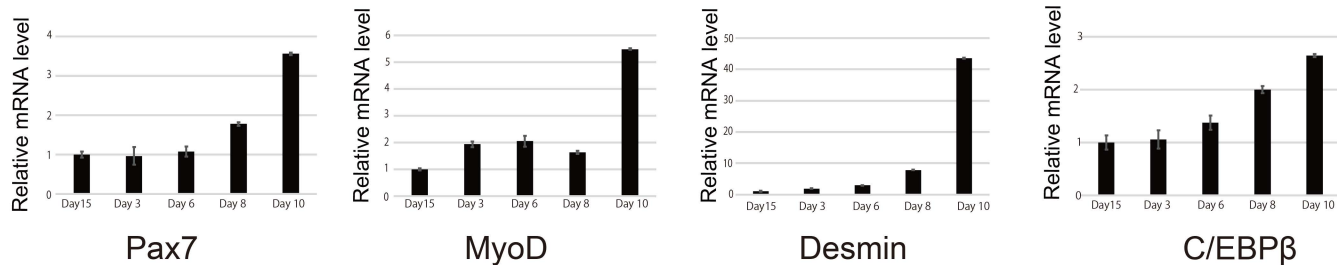

# Supplementary Figure S3

# Muscle

# Adipo

Tissue

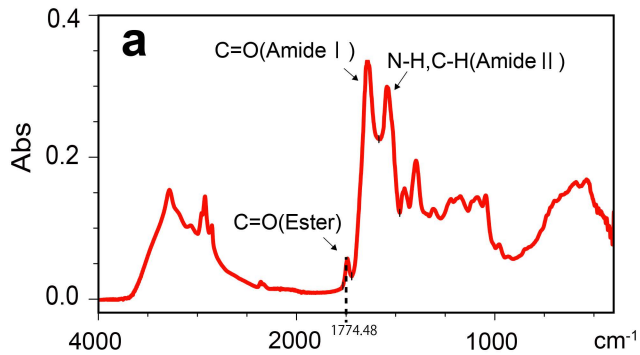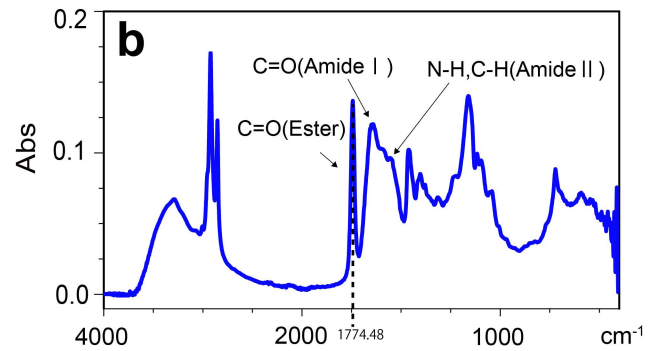

Meat buds

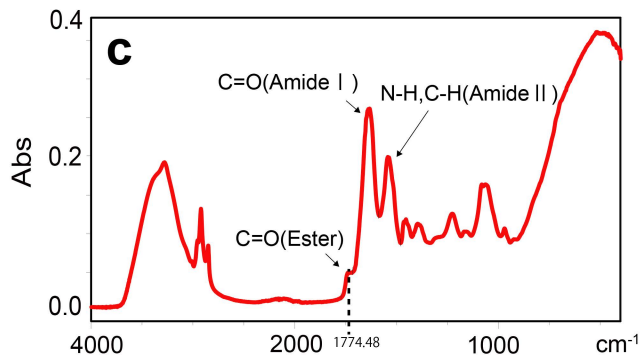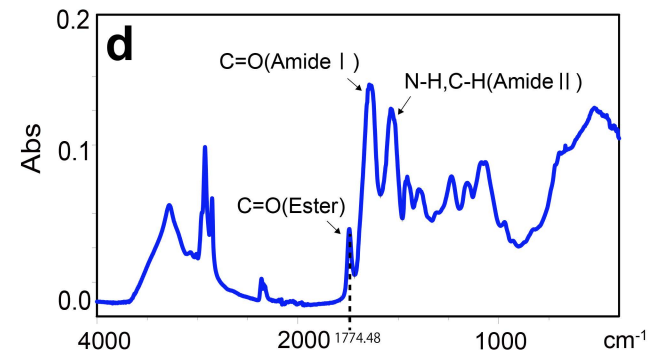

**e**

## Amide

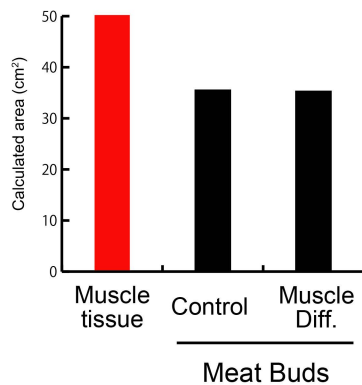

## Ester

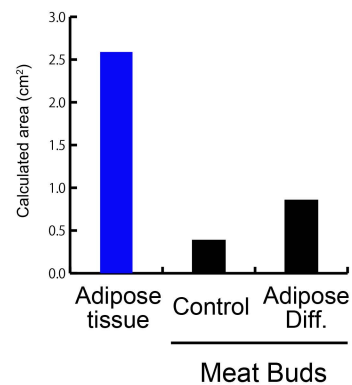

Supplementary Figure S4

Meat buds (culture)

Meat buds (collagen)

Fresh tissue

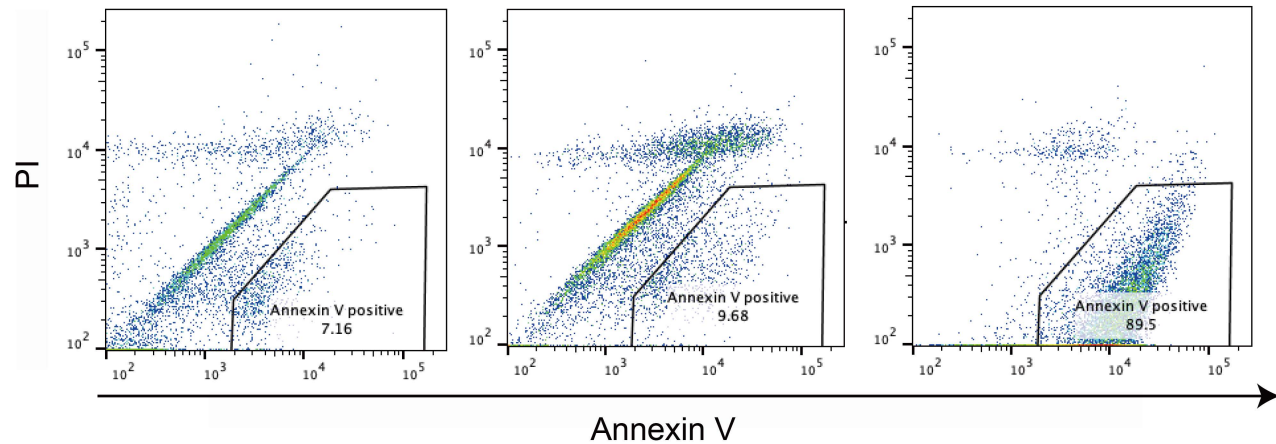

**Supplementary Figure S5**

Supplementary Table S1: Antibodies used for cell surface marker screening

| Reactivity | Antigen              | Clone         |
|------------|----------------------|---------------|
| Human      | CD3                  | SK7           |
|            | CD3                  | UCHT1         |
|            | CD4                  | SK3           |
|            | CD8                  | RPA-T8        |
|            | CD9                  | M-L13         |
|            | CD11a                | G43-25B       |
|            | CD11b                | 2LPM19c       |
|            | CD11b                | ICRF44        |
|            | CD11b                | D12           |
|            | CD11c                | S-HCL-3       |
|            | CD17                 | G035          |
|            | CD18                 | 6.7           |
|            | CD19                 | HD37          |
|            | CD25                 | 2A3           |
|            | CD29                 | MAR4          |
|            | CD29                 | TS2/16        |
|            | CD31                 | WM59          |
|            | CD31                 | MB78.2        |
|            | CD31                 | REA730        |
|            | CD34                 | 5B1           |
|            | CD41a                | HiP8          |
|            | CD42b                | HiP1          |
|            | CD44                 | 515           |
|            | CD44                 | G44-26        |
|            | CD45                 | Hi30          |
|            | CD45                 | REA747        |
|            | CD45                 | 2D1           |
|            | CD48                 | TU145         |
|            | CD49a                | SR84          |
|            | CD49b                | 12F1          |
|            | CD49c                | C3H.1         |
|            | CD49d                | 9F10          |
|            | CD49e                | IIA1          |
|            | CD49f                | G0H3          |
|            | CD51/61              | 23C6          |
|            | CD52                 | 4C8           |
|            | CD55                 | JS11          |
|            | CD56                 | B159          |
|            | CD56                 | MEM188        |
|            | CD56                 | NCAM16.2      |
|            | CD61                 | VI-PL2        |
|            | CD62E                | 68-5H11       |
|            | CD62L                | DREG-56       |
|            | CD63                 | H5C6          |
|            | CD65                 | VIM8          |
|            | CD68                 | Y1/82A        |
|            | CD73                 | REA804        |
|            | CD73                 | AD2           |
|            | CD81                 | JS-81         |
|            | CD82                 | REA221        |
|            | CD82                 | ASL-24        |
|            | CD90                 | 5.00E+10      |
|            | CD101                | V7.1          |
|            | CD102                | CBR-1C2/2     |
|            | CD103                | Ber-ACT8      |
|            | CD104                | 439-9B        |
|            | CD105                | 266           |
|            | CD106                | STA           |
|            | CD106                | 51-10c9       |
|            | CD110                | 1.6.1         |
|            | CD111                | CK41          |
|            | CD115                | 9-4D2-1E4     |
| Reactivity | Antigen              | Clone         |
| Human      | CD116                | hGMCsFR-M1    |
|            | CD120b               | hTNFR-M1      |
|            | CDw125               | A14           |
|            | CD126                | M5            |
|            | CD131                | 3D7           |
|            | CD132                | AG184         |
|            | CD133                | W683C1        |
|            | CD135                | 4G8           |
|            | CD136                | Z1g4          |
|            | CD138                | MI15          |
|            | CD140a               | aR1           |
|            | CD140a               | 16A1          |
|            | CD144                | 55-7H1        |
|            | CD146                | P1H12         |
|            | CD150                | A12           |
|            | CD156c               | 11G2          |
|            | CD157                | SY/11B5       |
|            | CD160                | BY55          |
|            | CD166                | 3A6           |
|            | CD182                | 6C6           |
|            | CD184                | 1D9           |
|            | CD194                | 1G1           |
|            | CD199                | 112509        |
|            | CD200                | OX-104        |
|            | CD201                | RCR-401       |
|            | CD201                | RCR-252       |
|            | CD203c               | NP4D6         |
|            | CD204                | U23-56        |
|            | CD207                | 2G3           |
|            | CD208                | 110-1112      |
|            | CD210a               | 3F9           |
|            | CD212                | 2.40E+06      |
|            | CD215                | JM7A4         |
|            | CD218a               | H44           |
|            | CD220                | 3B6/IR        |
|            | CD223                | T47-530       |
|            | CD234                | NaM185-203    |
|            | CD235a               | REA175        |
|            | CD235a               | GA-R2(HIR2)   |
|            | CD239                | B64           |
|            | CD249                | 2D3/APA       |
|            | CD252                | Ik-1          |
|            | CD253                | RIK-2         |
|            | CD266                | ITME-1        |
|            | CD271                | C40-1457      |
|            | CD271                | ME20.4-1.H4   |
|            | CD272                | JC68-540      |
|            | CD277                | 232-5         |
|            | CD284                | TF901         |
|            | CD300c               | TX45          |
|            | CD309                | 89106         |
|            | CD318                | CU81          |
|            | CD324                | 67A4          |
|            | CD325                | 8C11          |
|            | CD328                | F023-420      |
|            | CD344                | CH3A4A7       |
|            | CD354                | 6B1           |
|            | CXCR5                | RF882         |
|            | E-cadherin           | 36/E-Cadherin |
|            | Fibroblast           | REA165        |
|            | Foxp3                | 259D/C7       |
|            | IgG                  | G18-145       |
| Reactivity | Antigen              | Clone         |
| Human      | IL-21R               | 17A12         |
|            | Leptin R             | 52263         |
|            | P-glycoprotein       | 17F9          |
|            | SSEA-3               | MC-631        |
|            | Stro-1               | STRO-1        |
|            | TLR9                 | e872-1665     |
| Mouse      | CD3                  | 17A2          |
|            | CD3e                 | 1452c11       |
|            | CD4                  | RM4-C5        |
|            | CD4                  | GK1.5         |
|            | CD8a                 | 53-6.7        |
|            | CD9                  | KMC8          |
|            | CD11a                | 2D7           |
|            | CD11b                | M1/70         |
|            | CD11c                | HL3           |
|            | CD11c                | N418          |
|            | CD18                 | C71/16        |
|            | CD25                 | PC61          |
|            | CD27                 | LG.3A10       |
|            | CD31                 | MEC13.3       |
|            | CD31                 | 390           |
|            | CD34                 | HM34          |
|            | CD34                 | RAM34         |
|            | CD36                 | CRF D-2712    |
|            | CD40                 | HM40-3        |
|            | CD41                 | MWRReg30      |
| Mouse      | CD44                 | IM7           |
|            | CD45                 | 30-F11        |
|            | CD45R                | RA3-6B2       |
|            | CD48                 | HM48-1        |
|            | CD49a                | HA31/8        |
|            | CD49b                | HMALPHA2      |
|            | CD49d                | R1-2          |
|            | CD49d                | DATK32        |
|            | CD49e                | 5H10-27       |
|            | CD51                 | RMV-7         |
|            | CD54                 | 3E2           |
|            | CD61                 | 2C9.G2        |
|            | CD62L                | MEL-14        |
|            | CD63                 | NVG-2         |
|            | CD73                 | TY/11.8       |
|            | CD73                 | TY/23         |
|            | CD81                 | Eat2          |
|            | CD90.2               | 30-H12        |
|            | CD90.2               | 53-2.1        |
|            | CD102                | 3C4           |
| Mouse      | CD103                | M290          |
|            | CD105                | MJ7/18        |
|            | CD106                | 429           |
|            | CD117                | 2B8           |
|            | CD120b               | TR75-89       |
|            | CD126                | D7715A        |
|            | CD133                | 315-2C11      |
|            | CD135                | A2F10.1       |
|            | CD138                | 281-2         |
|            | CD140a               | APA5          |
|            | CD144                | 11D4.1        |
|            | CD146                | ME-9F1        |
|            | CD154                | MR1           |
|            | CD169                | 3D6.112       |
|            | CD192                | SA203G11      |
|            | CD196                | 29-2L17       |
| Reactivity | Antigen              | Clone         |
| Mouse      | CD200                | OX-90         |
|            | CD206                | CD68c2        |
|            | CD210                | 1B1.3a        |
|            | CD284                | MTSS10        |
|            | CD309                | AVAS12a.1     |
|            | F4/80                | BM8           |
|            | Gr-1                 | RB6-8C5       |
|            | Integrin- $\alpha$ 7 |               |
|            | p75NGF-R             | MUR2          |
|            | Sca-1                | D7            |
|            | Sca-1                | E13-161.7     |
|            | Ter119               | Ter119        |
| Rat        | CD1d                 | WTH2          |
|            | CD2                  | OX34          |
|            | CD3                  | G4.18         |
|            | CD4                  | OX-35         |
|            | CD5                  | OX-19         |
|            | CD6                  | OX-52         |
|            | CD8a                 | OX-8          |
|            | CD8b                 | 341           |
|            | CD11b                | WT.5          |
|            | CD11b/c              | OX-42         |
|            | CD18                 | WT.3          |
|            | CD24                 | HIS50         |
|            | CD25                 | OX-39         |
|            | CD26                 | OX-61         |
|            | CD28                 | J319          |
|            | CD29                 | Ha2/5         |
|            | CD31                 | TLD-3A12      |
|            | CD32                 | D34-485       |
|            | CD42d                | RPM.4         |
|            | CD44H                | OX49          |
| Rat        | CD45                 | OX-1          |
|            | CD45RA               | OX-33         |
|            | Cd49b                | Ha1/29        |
|            | CD49d                | MRa.4-1       |
|            | CD54                 | 1A29          |
|            | CD59                 | TH9           |
|            | CD61                 | F11           |
|            | CD62L                | HRL1          |
|            | CD71                 | OX-26         |
|            | CD80                 | 3H5           |
|            | CD86                 | 24F           |
|            | CD90                 | OX-7          |
|            | CD103                | OX-62         |
|            | CD106                | MR106         |
|            | CD134                | OX-40         |
|            | CD161a               | 10/78         |
|            | CD172                | OX-41         |
|            | CD314                | 9C11G4        |
|            | Erythroid cells      | HIS49         |
|            | $\alpha\beta$ TCR    | R73           |
| Rat        | $\gamma\delta$ TCR   | V65           |
|            | Granulocytes         | RP-1          |
|            | RT1A                 | B5            |
|            | RT1B                 | OX-6          |
|            | RT1D                 | OX-17         |
|            | STRO-1               | Stro-1        |
| Sheep      | CD31                 | CO.3E1D4      |
|            | CD45                 | 1.11.32       |

0% ≤

1% ≤

5% ≤

10% ≤
